# Supplementary material
Source: publisher figshare collection journal article supplement (https://acs.figshare.com/ndownloader/files/4344928)
Supplement: Supplementary file 1 [file 4344928]

data_publication_text


_publ_requested_journal          'Inorg. Chem.'

_publ_contact_author_name        'Alan F. Williams'
_publ_contact_author_address     
;Department of inorganic, analytic and applied chemistry 
University of Geneva, Sciences II 
30 quai Ernest-Ansermet 
CH-1211 Gen\`eve 4 
;
_publ_contact_author_email       alan.williams@unige.ch
_publ_contact_author_phone       '+41 (0)22 379 64 25'
_publ_contact_author_fax         '+41 (0)22 379 68 30 '
loop_
_publ_author_name
_publ_author_address
'Tong, Lok H.'
;    Department of Inorganic, Analytical 
     and Applied Chemistry
     University of Geneva
     30, quai E. Ansermet
     CH - 1211 Geneva 4
     Switzerland
;
'Guenee, Laure'
;    Department of Inorganic, Analytical 
     and Applied Chemistry
     University of Geneva
     30, quai E. Ansermet
     CH - 1211 Geneva 4
     Switzerland
;
_publ_section_title              
;    Pentasubstituted Ferrocene and Dirhodium
     Tetracarboxylate as Building Blocks for
     Discrete Fullerene-like and Extended 
     Supramolecular Structures
;

 
data_publication_text


_publ_requested_journal          'Inorg. Chem.'

_publ_contact_author_name        'Alan F. Williams'
_publ_contact_author_address     
;Department of inorganic, analytic and applied chemistry 
University of Geneva, Sciences II 
30 quai Ernest-Ansermet 
CH-1211 Gen\`eve 4 
;
_publ_contact_author_email       alan.williams@unige.ch
_publ_contact_author_phone       '+41 (0)22 379 64 25'
_publ_contact_author_fax         '+41 (0)22 379 68 30 '
loop_
_publ_author_name
_publ_author_address
'Tong, Lok H.'
;    Department of Inorganic, Analytical 
     and Applied Chemistry
     University of Geneva
     30, quai E. Ansermet
     CH - 1211 Geneva 4
     Switzerland
;
'Guenee, Laure'
;    Department of Inorganic, Analytical 
     and Applied Chemistry
     University of Geneva
     30, quai E. Ansermet
     CH - 1211 Geneva 4
     Switzerland
;
_publ_section_title              
;    Pentasubstituted Ferrocene and Dirhodium
     Tetracarboxylate as Building Blocks for
     Discrete Fullerene-like and Extended 
     Supramolecular Structures
;

data_compound1

_audit_creation_method           SHELXL-97
_chemical_name_systematic        
;
 ?
;
_chemical_name_common            ?
_chemical_melting_point          ?
_chemical_formula_moiety         'C38 H47 Fe N10 O P, CHCl3'
_chemical_formula_sum            'C39 H48 Cl3 Fe N10 O P'
_chemical_formula_weight         866.04

loop_
_atom_type_symbol
_atom_type_description
_atom_type_scat_dispersion_real
_atom_type_scat_dispersion_imag
_atom_type_scat_source
C C 0.0033 0.0016 'International Tables Vol C Tables 4.2.6.8 and 6.1.1.4'
H H 0.0000 0.0000 'International Tables Vol C Tables 4.2.6.8 and 6.1.1.4'
N N 0.0061 0.0033 'International Tables Vol C Tables 4.2.6.8 and 6.1.1.4'
O O 0.0106 0.0060 'International Tables Vol C Tables 4.2.6.8 and 6.1.1.4'
P P 0.1023 0.0942 'International Tables Vol C Tables 4.2.6.8 and 6.1.1.4'
Fe Fe 0.3463 0.8444 'International Tables Vol C Tables 4.2.6.8 and 6.1.1.4'
Cl Cl 0.1484 0.1585 'International Tables Vol C Tables 4.2.6.8 and 6.1.1.4'

_symmetry_cell_setting           triclinic
_symmetry_space_group_name_H-M   P-1
_symmetry_int_tables_number      2
_symmetry_space_group_name_Hall  '-P 1'

loop_
_symmetry_equiv_pos_as_xyz
'x, y, z'
'-x, -y, -z'

_cell_length_a                   9.0221(8)
_cell_length_b                   10.4690(9)
_cell_length_c                   22.543(2)
_cell_angle_alpha                94.647(11)
_cell_angle_beta                 98.548(11)
_cell_angle_gamma                96.760(11)
_cell_volume                     2080.4(3)
_cell_formula_units_Z            2
_cell_measurement_temperature    180(2)
_cell_measurement_reflns_used    8000
_cell_measurement_theta_min      2.1
_cell_measurement_theta_max      25.8

_exptl_crystal_description       prism
_exptl_crystal_colour            red
_exptl_crystal_size_max          0.26
_exptl_crystal_size_mid          0.22
_exptl_crystal_size_min          0.08
_exptl_crystal_density_meas      ?
_exptl_crystal_density_diffrn    1.382
_exptl_crystal_density_method    'not measured'
_exptl_crystal_F_000             904
_exptl_absorpt_coefficient_mu    0.638
_exptl_absorpt_correction_type   numerical
_exptl_absorpt_correction_T_min  0.8772
_exptl_absorpt_correction_T_max  0.9500
_exptl_absorpt_process_details   'XRED; Stoe & Cie, 1999'

_exptl_special_details           
;
 ?
;

_diffrn_ambient_temperature      180(2)
_diffrn_radiation_wavelength     0.71069
_diffrn_radiation_type           MoK\a
_diffrn_radiation_source         'fine-focus sealed tube'
_diffrn_radiation_monochromator  graphite
_diffrn_measurement_device_type  'Stoe Ipds'
_diffrn_measurement_method       \f
_diffrn_detector_area_resol_mean 6
_diffrn_standards_number         ?
_diffrn_standards_interval_count ?
_diffrn_standards_interval_time  ?
_diffrn_standards_decay_%        0
_diffrn_reflns_number            16393
_diffrn_reflns_av_R_equivalents  0.1093
_diffrn_reflns_av_sigmaI/netI    0.1491
_diffrn_reflns_limit_h_min       -11
_diffrn_reflns_limit_h_max       11
_diffrn_reflns_limit_k_min       -12
_diffrn_reflns_limit_k_max       12
_diffrn_reflns_limit_l_min       -27
_diffrn_reflns_limit_l_max       27
_diffrn_reflns_theta_min         1.97
_diffrn_reflns_theta_max         25.90
_reflns_number_total             7511
_reflns_number_gt                4423
_reflns_threshold_expression     >2sigma(I)

_computing_data_collection       'EXPOSE (Stoe & Cie, 1999)'
_computing_cell_refinement       'CELL (Stoe & Cie, 1999)'
_computing_data_reduction        'XRED (Stoe & Cie, 1999)'
_computing_structure_solution    SIR97
_computing_structure_refinement  'SHELXL-97 (Sheldrick, 1997)'
_computing_molecular_graphics    ORTEP
_computing_publication_material  'SHELXL-97 (Sheldrick, 1997)'

_refine_special_details          
;
 Refinement of F^2^ against ALL reflections.  The weighted R-factor wR and
 goodness of fit S are based on F^2^, conventional R-factors R are based
 on F, with F set to zero for negative F^2^. The threshold expression of
 F^2^ > 2sigma(F^2^) is used only for calculating R-factors(gt) etc. and is
 not relevant to the choice of reflections for refinement.  R-factors based
 on F^2^ are statistically about twice as large as those based on F, and R-
 factors based on ALL data will be even larger.
;

_refine_ls_structure_factor_coef Fsqd
_refine_ls_matrix_type           full
_refine_ls_weighting_scheme      calc
_refine_ls_weighting_details     
'calc w=1/[\s^2^(Fo^2^)+(0.0513P)^2^+0.0000P] where P=(Fo^2^+2Fc^2^)/3'
_atom_sites_solution_primary     direct
_atom_sites_solution_secondary   difmap
_atom_sites_solution_hydrogens   geom
_refine_ls_hydrogen_treatment    constr
_refine_ls_extinction_method     none
_refine_ls_extinction_coef       ?
_refine_ls_number_reflns         7511
_refine_ls_number_parameters     507
_refine_ls_number_restraints     0
_refine_ls_R_factor_all          0.0941
_refine_ls_R_factor_gt           0.0474
_refine_ls_wR_factor_ref         0.1090
_refine_ls_wR_factor_gt          0.1005
_refine_ls_goodness_of_fit_ref   0.846
_refine_ls_restrained_S_all      0.846
_refine_ls_shift/su_max          0.004
_refine_ls_shift/su_mean         0.000

loop_
_atom_site_label
_atom_site_type_symbol
_atom_site_fract_x
_atom_site_fract_y
_atom_site_fract_z
_atom_site_U_iso_or_equiv
_atom_site_adp_type
_atom_site_occupancy
_atom_site_symmetry_multiplicity
_atom_site_calc_flag
_atom_site_refinement_flags
_atom_site_disorder_assembly
_atom_site_disorder_group
Fe1 Fe 0.83599(5) 0.96780(4) 0.785988(19) 0.01895(13) Uani 1 1 d . . .
C1 C 1.0196(3) 0.8714(3) 0.81273(13) 0.0221(7) Uani 1 1 d . . .
C2 C 1.0414(3) 1.0006(3) 0.84380(13) 0.0211(7) Uani 1 1 d . . .
C3 C 0.9170(3) 1.0121(3) 0.87652(13) 0.0195(7) Uani 1 1 d . . .
C4 C 0.8197(3) 0.8894(3) 0.86654(13) 0.0205(7) Uani 1 1 d . . .
C5 C 0.8820(3) 0.8041(3) 0.82700(13) 0.0202(7) Uani 1 1 d . . .
C6 C 0.8193(3) 0.6685(3) 0.80432(14) 0.0242(7) Uani 1 1 d . . .
C7 C 0.8917(4) 0.5588(4) 0.8023(2) 0.0560(13) Uani 1 1 d . . .
H7 H 0.9941 0.5598 0.8164 0.067 Uiso 1 1 calc R . .
C8 C 0.6713(4) 0.6215(3) 0.77950(14) 0.0266(8) Uani 1 1 d . . .
H8 H 0.5911 0.6698 0.7738 0.032 Uiso 1 1 calc R . .
C9 C 0.5327(4) 0.4056(3) 0.73416(17) 0.0377(9) Uani 1 1 d . . .
H9A H 0.4440 0.4484 0.7327 0.057 Uiso 1 1 calc R . .
H9B H 0.5199 0.3306 0.7557 0.057 Uiso 1 1 calc R . .
H9C H 0.5478 0.3798 0.6939 0.057 Uiso 1 1 calc R . .
C10 C 0.6855(3) 0.8559(3) 0.89513(13) 0.0229(7) Uani 1 1 d . . .
C11 C 0.6444(4) 0.7413(4) 0.92035(16) 0.0371(9) Uani 1 1 d . . .
H11 H 0.6993 0.6715 0.9200 0.044 Uiso 1 1 calc R . .
C12 C 0.5738(3) 0.9305(3) 0.90615(14) 0.0272(8) Uani 1 1 d . . .
H12 H 0.5665 1.0137 0.8954 0.033 Uiso 1 1 calc R . .
C13 C 0.3387(4) 0.8967(4) 0.95446(16) 0.0427(10) Uani 1 1 d . . .
H13A H 0.2527 0.8534 0.9269 0.064 Uiso 1 1 calc R . .
H13B H 0.3396 0.9885 0.9548 0.064 Uiso 1 1 calc R . .
H13C H 0.3329 0.8719 0.9942 0.064 Uiso 1 1 calc R . .
C14 C 0.9036(3) 1.1261(3) 0.91823(13) 0.0212(7) Uani 1 1 d . . .
C15 C 0.9883(4) 1.1619(3) 0.97607(15) 0.0315(8) Uani 1 1 d . . .
H15 H 1.0572 1.1127 0.9949 0.038 Uiso 1 1 calc R . .
C16 C 0.8186(4) 1.2242(3) 0.90946(15) 0.0319(9) Uani 1 1 d . . .
H16 H 0.7488 1.2304 0.8754 0.038 Uiso 1 1 calc R . .
C17 C 0.7864(6) 1.4249(5) 0.9730(2) 0.0709(15) Uani 1 1 d . . .
H17A H 0.7507 1.4602 0.9364 0.106 Uiso 1 1 calc R . .
H17B H 0.8602 1.4877 0.9981 0.106 Uiso 1 1 calc R . .
H17C H 0.7030 1.4029 0.9939 0.106 Uiso 1 1 calc R . .
C18 C 1.1697(3) 1.1036(3) 0.84556(13) 0.0229(7) Uani 1 1 d . . .
C19 C 1.3130(4) 1.0938(3) 0.83052(16) 0.0334(9) Uani 1 1 d . . .
H19 H 1.3415 1.0171 0.8149 0.040 Uiso 1 1 calc R . .
C20 C 1.1794(3) 1.2338(3) 0.86604(15) 0.0302(8) Uani 1 1 d . . .
H20 H 1.1029 1.2745 0.8798 0.036 Uiso 1 1 calc R . .
C21 C 1.3810(5) 1.4259(4) 0.8807(2) 0.0670(15) Uani 1 1 d . . .
H21A H 1.4694 1.4471 0.8627 0.100 Uiso 1 1 calc R . .
H21B H 1.4076 1.4389 0.9238 0.100 Uiso 1 1 calc R . .
H21C H 1.3066 1.4806 0.8678 0.100 Uiso 1 1 calc R . .
C22 C 1.1184(3) 0.8073(3) 0.77589(14) 0.0239(7) Uani 1 1 d . . .
C23 C 1.2469(4) 0.7484(3) 0.79551(16) 0.0309(8) Uani 1 1 d . . .
H23 H 1.2895 0.7508 0.8358 0.037 Uiso 1 1 calc R . .
C24 C 1.0961(4) 0.7778(4) 0.71426(16) 0.0353(9) Uani 1 1 d . . .
H24 H 1.0193 0.8018 0.6868 0.042 Uiso 1 1 calc R . .
C25 C 1.2312(6) 0.6584(6) 0.64104(19) 0.0759(16) Uani 1 1 d . . .
H25A H 1.1693 0.6963 0.6106 0.114 Uiso 1 1 calc R . .
H25B H 1.2055 0.5662 0.6357 0.114 Uiso 1 1 calc R . .
H25C H 1.3358 0.6803 0.6376 0.114 Uiso 1 1 calc R . .
C26 C 0.8186(4) 1.0294(3) 0.69923(13) 0.0241(7) Uani 1 1 d . . .
C27 C 0.7772(3) 1.1251(3) 0.74070(13) 0.0231(7) Uani 1 1 d . . .
H27 H 0.8234 1.2101 0.7496 0.028 Uiso 1 1 calc R . .
C28 C 0.6535(3) 1.0677(3) 0.76588(14) 0.0241(7) Uani 1 1 d . . .
H28 H 0.6045 1.1089 0.7939 0.029 Uiso 1 1 calc R . .
C29 C 0.6172(3) 0.9371(3) 0.74101(14) 0.0261(8) Uani 1 1 d . . .
H29 H 0.5401 0.8779 0.7497 0.031 Uiso 1 1 calc R . .
C30 C 0.7178(3) 0.9127(3) 0.70102(14) 0.0256(7) Uani 1 1 d . . .
H30 H 0.7193 0.8338 0.6791 0.031 Uiso 1 1 calc R . .
C31 C 1.0930(4) 1.1565(4) 0.65253(16) 0.0394(9) Uani 1 1 d . . .
C32 C 1.2102(4) 1.0681(4) 0.6752(2) 0.0535(11) Uani 1 1 d . . .
H32A H 1.3074 1.1190 0.6875 0.080 Uiso 1 1 calc R . .
H32B H 1.2164 1.0032 0.6434 0.080 Uiso 1 1 calc R . .
H32C H 1.1799 1.0273 0.7089 0.080 Uiso 1 1 calc R . .
C33 C 1.0928(5) 1.2658(4) 0.70240(17) 0.0469(11) Uani 1 1 d . . .
H33A H 1.0684 1.2293 0.7380 0.070 Uiso 1 1 calc R . .
H33B H 1.0189 1.3205 0.6890 0.070 Uiso 1 1 calc R . .
H33C H 1.1910 1.3160 0.7113 0.070 Uiso 1 1 calc R . .
C34 C 1.1416(5) 1.2137(5) 0.59603(19) 0.0614(13) Uani 1 1 d . . .
H34A H 1.0780 1.2772 0.5838 0.092 Uiso 1 1 calc R . .
H34B H 1.1322 1.1458 0.5639 0.092 Uiso 1 1 calc R . .
H34C H 1.2449 1.2535 0.6055 0.092 Uiso 1 1 calc R . .
C35 C 0.7657(4) 1.1239(4) 0.58298(15) 0.0391(9) Uani 1 1 d . . .
C36 C 0.6089(4) 1.0496(4) 0.58416(18) 0.0479(10) Uani 1 1 d . . .
H36A H 0.5357 1.0779 0.5544 0.072 Uiso 1 1 calc R . .
H36B H 0.5812 1.0657 0.6233 0.072 Uiso 1 1 calc R . .
H36C H 0.6117 0.9586 0.5755 0.072 Uiso 1 1 calc R . .
C37 C 0.7597(5) 1.2671(4) 0.60283(17) 0.0494(11) Uani 1 1 d . . .
H37A H 0.6767 1.2967 0.5783 0.074 Uiso 1 1 calc R . .
H37B H 0.8526 1.3175 0.5982 0.074 Uiso 1 1 calc R . .
H37C H 0.7461 1.2764 0.6443 0.074 Uiso 1 1 calc R . .
C38 C 0.7981(6) 1.1098(5) 0.51725(17) 0.0609(13) Uani 1 1 d . . .
H38A H 0.7985 1.0201 0.5045 0.091 Uiso 1 1 calc R . .
H38B H 0.8948 1.1570 0.5154 0.091 Uiso 1 1 calc R . .
H38C H 0.7209 1.1434 0.4912 0.091 Uiso 1 1 calc R . .
C39 C 0.7481(6) 0.6557(4) 0.5597(2) 0.0611(13) Uani 1 1 d . . .
H39 H 0.8103 0.7402 0.5693 0.073 Uiso 1 1 calc R . .
Cl1 Cl 0.7311(3) 0.58700(12) 0.62677(6) 0.1207(8) Uani 1 1 d . . .
Cl2 Cl 0.57332(19) 0.67695(17) 0.51928(11) 0.1293(8) Uani 1 1 d . . .
Cl3 Cl 0.84007(18) 0.55535(13) 0.51476(6) 0.0786(4) Uani 1 1 d . . .
N1 N 0.8005(3) 0.4513(3) 0.77804(19) 0.0576(11) Uani 1 1 d . . .
N2 N 0.6642(3) 0.4939(3) 0.76508(13) 0.0315(7) Uani 1 1 d . . .
N3 N 0.5193(3) 0.7424(3) 0.94470(13) 0.0421(8) Uani 1 1 d . . .
N4 N 0.4772(3) 0.8603(3) 0.93540(12) 0.0318(7) Uani 1 1 d . . .
N5 N 0.9589(3) 1.2738(3) 1.00072(13) 0.0380(8) Uani 1 1 d . . .
N6 N 0.8535(3) 1.3115(3) 0.95910(14) 0.0376(8) Uani 1 1 d . . .
N7 N 1.4047(3) 1.2052(3) 0.84075(14) 0.0379(8) Uani 1 1 d . . .
N8 N 1.3188(3) 1.2902(3) 0.86232(13) 0.0362(8) Uani 1 1 d . . .
N9 N 1.3013(3) 0.6886(3) 0.75044(14) 0.0356(7) Uani 1 1 d . . .
N10 N 1.2055(3) 0.7081(3) 0.70072(13) 0.0396(8) Uani 1 1 d . . .
O1 O 0.9289(3) 0.9201(2) 0.60358(10) 0.0371(6) Uani 1 1 d . . .
P1 P 0.90848(10) 1.04924(9) 0.63290(4) 0.0300(2) Uani 1 1 d . . .

loop_
_atom_site_aniso_label
_atom_site_aniso_U_11
_atom_site_aniso_U_22
_atom_site_aniso_U_33
_atom_site_aniso_U_23
_atom_site_aniso_U_13
_atom_site_aniso_U_12
Fe1 0.0163(2) 0.0168(3) 0.0241(2) 0.00065(18) 0.00506(18) 0.00243(19)
C1 0.0182(15) 0.0190(17) 0.0289(17) 0.0005(13) 0.0014(13) 0.0050(14)
C2 0.0161(14) 0.0205(17) 0.0270(16) 0.0019(13) 0.0026(13) 0.0051(14)
C3 0.0175(15) 0.0176(16) 0.0231(16) 0.0032(12) 0.0005(12) 0.0035(14)
C4 0.0186(15) 0.0196(17) 0.0241(16) 0.0052(13) 0.0041(12) 0.0034(14)
C5 0.0206(15) 0.0146(16) 0.0263(16) 0.0042(12) 0.0035(13) 0.0052(14)
C6 0.0214(15) 0.0182(18) 0.0337(18) 0.0032(13) 0.0062(13) 0.0031(15)
C7 0.0248(19) 0.024(2) 0.112(4) -0.001(2) -0.007(2) 0.0019(19)
C8 0.0229(16) 0.0172(18) 0.0404(19) 0.0021(14) 0.0056(14) 0.0054(15)
C9 0.0301(18) 0.025(2) 0.054(2) -0.0056(16) 0.0062(17) -0.0055(17)
C10 0.0219(16) 0.0239(18) 0.0217(16) 0.0005(13) 0.0033(13) -0.0010(15)
C11 0.037(2) 0.028(2) 0.050(2) 0.0089(16) 0.0166(17) 0.0042(18)
C12 0.0260(17) 0.0286(19) 0.0274(17) 0.0035(14) 0.0084(14) -0.0004(16)
C13 0.0324(19) 0.057(3) 0.041(2) -0.0009(18) 0.0205(17) -0.0005(19)
C14 0.0182(15) 0.0206(18) 0.0259(16) 0.0026(13) 0.0098(13) -0.0009(15)
C15 0.0329(19) 0.027(2) 0.0330(19) 0.0019(15) 0.0029(15) 0.0016(17)
C16 0.0292(18) 0.027(2) 0.036(2) -0.0074(15) 0.0029(15) -0.0004(17)
C17 0.066(3) 0.045(3) 0.099(4) -0.013(3) 0.009(3) 0.013(3)
C18 0.0188(15) 0.0197(17) 0.0294(17) 0.0008(13) 0.0047(13) -0.0010(14)
C19 0.0236(17) 0.0253(19) 0.051(2) -0.0053(16) 0.0091(16) 0.0031(16)
C20 0.0211(16) 0.027(2) 0.044(2) -0.0042(15) 0.0155(15) 0.0007(15)
C21 0.052(3) 0.035(2) 0.111(4) -0.026(2) 0.038(3) -0.017(2)
C22 0.0180(15) 0.0174(17) 0.0360(18) -0.0013(14) 0.0048(13) 0.0029(14)
C23 0.0242(17) 0.028(2) 0.0387(19) -0.0059(15) 0.0014(15) 0.0061(16)
C24 0.0333(19) 0.037(2) 0.037(2) 0.0004(16) 0.0039(16) 0.0186(18)
C25 0.091(4) 0.104(4) 0.045(3) -0.005(3) 0.021(3) 0.055(3)
C26 0.0276(16) 0.0224(18) 0.0232(16) 0.0022(13) 0.0052(13) 0.0056(15)
C27 0.0242(16) 0.0183(17) 0.0268(17) 0.0009(13) 0.0026(13) 0.0053(15)
C28 0.0229(16) 0.0254(19) 0.0263(17) 0.0032(13) 0.0056(13) 0.0106(15)
C29 0.0179(15) 0.0248(19) 0.0344(18) 0.0061(14) 0.0001(14) 0.0014(15)
C30 0.0265(16) 0.0226(18) 0.0264(17) -0.0005(13) 0.0021(14) 0.0034(15)
C31 0.039(2) 0.038(2) 0.043(2) 0.0065(17) 0.0180(17) -0.0010(19)
C32 0.037(2) 0.056(3) 0.069(3) 0.008(2) 0.018(2) 0.001(2)
C33 0.046(2) 0.040(2) 0.052(2) -0.0021(19) 0.0145(19) -0.011(2)
C34 0.068(3) 0.068(3) 0.054(3) 0.016(2) 0.031(2) -0.002(3)
C35 0.060(2) 0.033(2) 0.0257(18) 0.0057(15) 0.0058(17) 0.011(2)
C36 0.056(3) 0.044(2) 0.043(2) 0.0087(18) -0.0034(19) 0.014(2)
C37 0.071(3) 0.038(2) 0.040(2) 0.0088(18) 0.004(2) 0.013(2)
C38 0.096(4) 0.062(3) 0.029(2) 0.0097(19) 0.010(2) 0.021(3)
C39 0.087(3) 0.036(2) 0.063(3) 0.005(2) 0.024(3) 0.006(3)
Cl1 0.268(2) 0.0349(7) 0.0771(9) 0.0010(6) 0.0938(12) 0.0112(10)
Cl2 0.0825(10) 0.0726(11) 0.211(2) -0.0268(12) -0.0266(12) 0.0139(9)
Cl3 0.1239(11) 0.0607(8) 0.0672(8) 0.0158(6) 0.0476(8) 0.0298(8)
N1 0.0290(17) 0.0211(18) 0.117(3) -0.0052(18) -0.0006(19) 0.0061(16)
N2 0.0248(14) 0.0178(15) 0.0506(18) 0.0007(13) 0.0049(13) 0.0004(13)
N3 0.0404(18) 0.040(2) 0.0461(19) 0.0101(15) 0.0155(15) -0.0066(16)
N4 0.0274(15) 0.0376(19) 0.0301(15) -0.0007(13) 0.0127(12) -0.0047(14)
N5 0.0434(18) 0.0292(18) 0.0390(17) -0.0066(14) 0.0109(15) -0.0032(15)
N6 0.0339(16) 0.0225(17) 0.055(2) -0.0150(14) 0.0161(15) 0.0011(15)
N7 0.0232(14) 0.0282(17) 0.062(2) -0.0067(15) 0.0147(14) -0.0018(14)
N8 0.0279(15) 0.0244(16) 0.0542(19) -0.0109(14) 0.0160(14) -0.0069(14)
N9 0.0263(15) 0.0314(18) 0.0495(19) -0.0052(14) 0.0054(14) 0.0122(14)
N10 0.0389(17) 0.044(2) 0.0396(18) -0.0040(14) 0.0140(14) 0.0182(16)
O1 0.0491(15) 0.0307(14) 0.0355(13) -0.0002(11) 0.0162(11) 0.0118(12)
P1 0.0385(5) 0.0266(5) 0.0268(5) 0.0024(4) 0.0117(4) 0.0050(4)

_geom_special_details            
;
 All esds (except the esd in the dihedral angle between two l.s. planes)
 are estimated using the full covariance matrix.  The cell esds are taken
 into account individually in the estimation of esds in distances, angles
 and torsion angles; correlations between esds in cell parameters are only
 used when they are defined by crystal symmetry.  An approximate (isotropic)
 treatment of cell esds is used for estimating esds involving l.s. planes.
;

loop_
_geom_bond_atom_site_label_1
_geom_bond_atom_site_label_2
_geom_bond_distance
_geom_bond_site_symmetry_2
_geom_bond_publ_flag
Fe1 C30 2.051(3) . ?
Fe1 C29 2.057(3) . ?
Fe1 C3 2.059(3) . ?
Fe1 C28 2.067(3) . ?
Fe1 C5 2.067(3) . ?
Fe1 C4 2.070(3) . ?
Fe1 C2 2.076(3) . ?
Fe1 C1 2.078(3) . ?
Fe1 C27 2.087(3) . ?
Fe1 C26 2.098(3) . ?
C1 C5 1.445(4) . ?
C1 C2 1.449(4) . ?
C1 C22 1.485(4) . ?
C2 C3 1.443(4) . ?
C2 C18 1.480(4) . ?
C3 C4 1.449(4) . ?
C3 C14 1.486(4) . ?
C4 C5 1.431(4) . ?
C4 C10 1.475(4) . ?
C5 C6 1.485(4) . ?
C6 C8 1.384(4) . ?
C6 C7 1.387(5) . ?
C7 N1 1.338(5) . ?
C7 H7 0.9300 . ?
C8 N2 1.340(4) . ?
C8 H8 0.9300 . ?
C9 N2 1.463(4) . ?
C9 H9A 0.9600 . ?
C9 H9B 0.9600 . ?
C9 H9C 0.9600 . ?
C10 C12 1.383(5) . ?
C10 C11 1.403(5) . ?
C11 N3 1.327(5) . ?
C11 H11 0.9300 . ?
C12 N4 1.354(4) . ?
C12 H12 0.9300 . ?
C13 N4 1.462(4) . ?
C13 H13A 0.9600 . ?
C13 H13B 0.9600 . ?
C13 H13C 0.9600 . ?
C14 C16 1.362(5) . ?
C14 C15 1.408(4) . ?
C15 N5 1.328(5) . ?
C15 H15 0.9300 . ?
C16 N6 1.360(4) . ?
C16 H16 0.9300 . ?
C17 N6 1.428(6) . ?
C17 H17A 0.9600 . ?
C17 H17B 0.9600 . ?
C17 H17C 0.9600 . ?
C18 C20 1.392(5) . ?
C18 C19 1.398(5) . ?
C19 N7 1.330(4) . ?
C19 H19 0.9300 . ?
C20 N8 1.343(4) . ?
C20 H20 0.9300 . ?
C21 N8 1.467(4) . ?
C21 H21A 0.9600 . ?
C21 H21B 0.9600 . ?
C21 H21C 0.9600 . ?
C22 C24 1.378(5) . ?
C22 C23 1.407(5) . ?
C23 N9 1.335(4) . ?
C23 H23 0.9300 . ?
C24 N10 1.350(5) . ?
C24 H24 0.9300 . ?
C25 N10 1.464(5) . ?
C25 H25A 0.9600 . ?
C25 H25B 0.9600 . ?
C25 H25C 0.9600 . ?
C26 C27 1.434(4) . ?
C26 C30 1.442(4) . ?
C26 P1 1.819(3) . ?
C27 C28 1.419(4) . ?
C27 H27 0.9300 . ?
C28 C29 1.417(5) . ?
C28 H28 0.9300 . ?
C29 C30 1.401(5) . ?
C29 H29 0.9300 . ?
C30 H30 0.9300 . ?
C31 C33 1.539(5) . ?
C31 C32 1.544(6) . ?
C31 C34 1.550(5) . ?
C31 P1 1.867(3) . ?
C32 H32A 0.9600 . ?
C32 H32B 0.9600 . ?
C32 H32C 0.9600 . ?
C33 H33A 0.9600 . ?
C33 H33B 0.9600 . ?
C33 H33C 0.9600 . ?
C34 H34A 0.9600 . ?
C34 H34B 0.9600 . ?
C34 H34C 0.9600 . ?
C35 C36 1.537(5) . ?
C35 C37 1.539(5) . ?
C35 C38 1.551(5) . ?
C35 P1 1.867(4) . ?
C36 H36A 0.9600 . ?
C36 H36B 0.9600 . ?
C36 H36C 0.9600 . ?
C37 H37A 0.9600 . ?
C37 H37B 0.9600 . ?
C37 H37C 0.9600 . ?
C38 H38A 0.9600 . ?
C38 H38B 0.9600 . ?
C38 H38C 0.9600 . ?
C39 Cl1 1.746(5) . ?
C39 Cl2 1.748(5) . ?
C39 Cl3 1.761(5) . ?
C39 H39 0.9800 . ?
N1 N2 1.356(4) . ?
N3 N4 1.356(4) . ?
N5 N6 1.350(4) . ?
N7 N8 1.354(4) . ?
N9 N10 1.355(4) . ?
O1 P1 1.499(3) . ?

loop_
_geom_angle_atom_site_label_1
_geom_angle_atom_site_label_2
_geom_angle_atom_site_label_3
_geom_angle
_geom_angle_site_symmetry_1
_geom_angle_site_symmetry_3
_geom_angle_publ_flag
C30 Fe1 C29 39.88(13) . . ?
C30 Fe1 C3 169.29(12) . . ?
C29 Fe1 C3 130.06(13) . . ?
C30 Fe1 C28 67.23(13) . . ?
C29 Fe1 C28 40.20(13) . . ?
C3 Fe1 C28 107.09(13) . . ?
C30 Fe1 C5 108.84(13) . . ?
C29 Fe1 C5 108.81(12) . . ?
C3 Fe1 C5 68.76(12) . . ?
C28 Fe1 C5 137.82(12) . . ?
C30 Fe1 C4 130.49(12) . . ?
C29 Fe1 C4 103.48(12) . . ?
C3 Fe1 C4 41.10(11) . . ?
C28 Fe1 C4 108.12(13) . . ?
C5 Fe1 C4 40.46(12) . . ?
C30 Fe1 C2 149.07(13) . . ?
C29 Fe1 C2 170.86(13) . . ?
C3 Fe1 C2 40.85(12) . . ?
C28 Fe1 C2 136.24(13) . . ?
C5 Fe1 C2 68.64(12) . . ?
C4 Fe1 C2 68.69(12) . . ?
C30 Fe1 C1 116.68(13) . . ?
C29 Fe1 C1 141.99(13) . . ?
C3 Fe1 C1 68.84(12) . . ?
C28 Fe1 C1 175.87(13) . . ?
C5 Fe1 C1 40.81(11) . . ?
C4 Fe1 C1 68.50(12) . . ?
C2 Fe1 C1 40.83(12) . . ?
C30 Fe1 C27 67.52(13) . . ?
C29 Fe1 C27 67.47(12) . . ?
C3 Fe1 C27 114.51(12) . . ?
C28 Fe1 C27 39.96(12) . . ?
C5 Fe1 C27 176.05(12) . . ?
C4 Fe1 C27 140.65(13) . . ?
C2 Fe1 C27 115.25(12) . . ?
C1 Fe1 C27 141.74(12) . . ?
C30 Fe1 C26 40.65(12) . . ?
C29 Fe1 C26 67.75(13) . . ?
C3 Fe1 C26 147.10(12) . . ?
C28 Fe1 C26 67.42(13) . . ?
C5 Fe1 C26 137.92(12) . . ?
C4 Fe1 C26 170.75(12) . . ?
C2 Fe1 C26 120.29(12) . . ?
C1 Fe1 C26 116.27(13) . . ?
C27 Fe1 C26 40.09(12) . . ?
C5 C1 C2 107.6(3) . . ?
C5 C1 C22 122.4(3) . . ?
C2 C1 C22 129.8(3) . . ?
C5 C1 Fe1 69.19(17) . . ?
C2 C1 Fe1 69.51(18) . . ?
C22 C1 Fe1 129.9(2) . . ?
C3 C2 C1 107.9(3) . . ?
C3 C2 C18 124.1(3) . . ?
C1 C2 C18 127.9(3) . . ?
C3 C2 Fe1 68.91(16) . . ?
C1 C2 Fe1 69.66(16) . . ?
C18 C2 Fe1 129.0(2) . . ?
C2 C3 C4 107.9(3) . . ?
C2 C3 C14 124.7(3) . . ?
C4 C3 C14 127.0(3) . . ?
C2 C3 Fe1 70.23(16) . . ?
C4 C3 Fe1 69.87(16) . . ?
C14 C3 Fe1 130.6(2) . . ?
C5 C4 C3 108.0(2) . . ?
C5 C4 C10 126.0(3) . . ?
C3 C4 C10 125.9(3) . . ?
C5 C4 Fe1 69.68(17) . . ?
C3 C4 Fe1 69.03(16) . . ?
C10 C4 Fe1 129.7(2) . . ?
C4 C5 C1 108.6(2) . . ?
C4 C5 C6 126.6(3) . . ?
C1 C5 C6 124.8(3) . . ?
C4 C5 Fe1 69.87(17) . . ?
C1 C5 Fe1 70.00(17) . . ?
C6 C5 Fe1 126.5(2) . . ?
C8 C6 C7 103.0(3) . . ?
C8 C6 C5 127.5(3) . . ?
C7 C6 C5 129.5(3) . . ?
N1 C7 C6 113.7(3) . . ?
N1 C7 H7 123.1 . . ?
C6 C7 H7 123.1 . . ?
N2 C8 C6 107.8(3) . . ?
N2 C8 H8 126.1 . . ?
C6 C8 H8 126.1 . . ?
N2 C9 H9A 109.5 . . ?
N2 C9 H9B 109.5 . . ?
H9A C9 H9B 109.5 . . ?
N2 C9 H9C 109.5 . . ?
H9A C9 H9C 109.5 . . ?
H9B C9 H9C 109.5 . . ?
C12 C10 C11 103.2(3) . . ?
C12 C10 C4 129.0(3) . . ?
C11 C10 C4 127.7(3) . . ?
N3 C11 C10 113.3(4) . . ?
N3 C11 H11 123.4 . . ?
C10 C11 H11 123.4 . . ?
N4 C12 C10 107.5(3) . . ?
N4 C12 H12 126.2 . . ?
C10 C12 H12 126.2 . . ?
N4 C13 H13A 109.5 . . ?
N4 C13 H13B 109.5 . . ?
H13A C13 H13B 109.5 . . ?
N4 C13 H13C 109.5 . . ?
H13A C13 H13C 109.5 . . ?
H13B C13 H13C 109.5 . . ?
C16 C14 C15 103.5(3) . . ?
C16 C14 C3 129.9(3) . . ?
C15 C14 C3 126.4(3) . . ?
N5 C15 C14 112.5(3) . . ?
N5 C15 H15 123.8 . . ?
C14 C15 H15 123.8 . . ?
N6 C16 C14 108.2(3) . . ?
N6 C16 H16 125.9 . . ?
C14 C16 H16 125.9 . . ?
N6 C17 H17A 109.5 . . ?
N6 C17 H17B 109.5 . . ?
H17A C17 H17B 109.5 . . ?
N6 C17 H17C 109.5 . . ?
H17A C17 H17C 109.5 . . ?
H17B C17 H17C 109.5 . . ?
C20 C18 C19 102.8(3) . . ?
C20 C18 C2 128.0(3) . . ?
C19 C18 C2 129.1(3) . . ?
N7 C19 C18 113.3(3) . . ?
N7 C19 H19 123.3 . . ?
C18 C19 H19 123.3 . . ?
N8 C20 C18 107.8(3) . . ?
N8 C20 H20 126.1 . . ?
C18 C20 H20 126.1 . . ?
N8 C21 H21A 109.5 . . ?
N8 C21 H21B 109.5 . . ?
H21A C21 H21B 109.5 . . ?
N8 C21 H21C 109.5 . . ?
H21A C21 H21C 109.5 . . ?
H21B C21 H21C 109.5 . . ?
C24 C22 C23 103.0(3) . . ?
C24 C22 C1 128.0(3) . . ?
C23 C22 C1 128.6(3) . . ?
N9 C23 C22 113.2(3) . . ?
N9 C23 H23 123.4 . . ?
C22 C23 H23 123.4 . . ?
N10 C24 C22 108.0(3) . . ?
N10 C24 H24 126.0 . . ?
C22 C24 H24 126.0 . . ?
N10 C25 H25A 109.5 . . ?
N10 C25 H25B 109.5 . . ?
H25A C25 H25B 109.5 . . ?
N10 C25 H25C 109.5 . . ?
H25A C25 H25C 109.5 . . ?
H25B C25 H25C 109.5 . . ?
C27 C26 C30 106.2(3) . . ?
C27 C26 P1 129.8(2) . . ?
C30 C26 P1 118.9(2) . . ?
C27 C26 Fe1 69.52(17) . . ?
C30 C26 Fe1 67.93(17) . . ?
P1 C26 Fe1 146.57(19) . . ?
C28 C27 C26 108.2(3) . . ?
C28 C27 Fe1 69.28(18) . . ?
C26 C27 Fe1 70.39(18) . . ?
C28 C27 H27 125.9 . . ?
C26 C27 H27 125.9 . . ?
Fe1 C27 H27 126.0 . . ?
C29 C28 C27 108.5(3) . . ?
C29 C28 Fe1 69.53(19) . . ?
C27 C28 Fe1 70.76(19) . . ?
C29 C28 H28 125.8 . . ?
C27 C28 H28 125.8 . . ?
Fe1 C28 H28 125.5 . . ?
C30 C29 C28 108.0(3) . . ?
C30 C29 Fe1 69.84(17) . . ?
C28 C29 Fe1 70.27(17) . . ?
C30 C29 H29 126.0 . . ?
C28 C29 H29 126.0 . . ?
Fe1 C29 H29 125.5 . . ?
C29 C30 C26 109.1(3) . . ?
C29 C30 Fe1 70.29(17) . . ?
C26 C30 Fe1 71.42(16) . . ?
C29 C30 H30 125.4 . . ?
C26 C30 H30 125.4 . . ?
Fe1 C30 H30 124.4 . . ?
C33 C31 C32 108.9(3) . . ?
C33 C31 C34 110.0(3) . . ?
C32 C31 C34 107.5(3) . . ?
C33 C31 P1 113.3(3) . . ?
C32 C31 P1 105.7(3) . . ?
C34 C31 P1 111.2(3) . . ?
C31 C32 H32A 109.5 . . ?
C31 C32 H32B 109.5 . . ?
H32A C32 H32B 109.5 . . ?
C31 C32 H32C 109.5 . . ?
H32A C32 H32C 109.5 . . ?
H32B C32 H32C 109.5 . . ?
C31 C33 H33A 109.5 . . ?
C31 C33 H33B 109.5 . . ?
H33A C33 H33B 109.5 . . ?
C31 C33 H33C 109.5 . . ?
H33A C33 H33C 109.5 . . ?
H33B C33 H33C 109.5 . . ?
C31 C34 H34A 109.5 . . ?
C31 C34 H34B 109.5 . . ?
H34A C34 H34B 109.5 . . ?
C31 C34 H34C 109.5 . . ?
H34A C34 H34C 109.5 . . ?
H34B C34 H34C 109.5 . . ?
C36 C35 C37 107.6(3) . . ?
C36 C35 C38 108.1(3) . . ?
C37 C35 C38 109.6(3) . . ?
C36 C35 P1 108.1(2) . . ?
C37 C35 P1 113.7(2) . . ?
C38 C35 P1 109.6(3) . . ?
C35 C36 H36A 109.5 . . ?
C35 C36 H36B 109.5 . . ?
H36A C36 H36B 109.5 . . ?
C35 C36 H36C 109.5 . . ?
H36A C36 H36C 109.5 . . ?
H36B C36 H36C 109.5 . . ?
C35 C37 H37A 109.5 . . ?
C35 C37 H37B 109.5 . . ?
H37A C37 H37B 109.5 . . ?
C35 C37 H37C 109.5 . . ?
H37A C37 H37C 109.5 . . ?
H37B C37 H37C 109.5 . . ?
C35 C38 H38A 109.5 . . ?
C35 C38 H38B 109.5 . . ?
H38A C38 H38B 109.5 . . ?
C35 C38 H38C 109.5 . . ?
H38A C38 H38C 109.5 . . ?
H38B C38 H38C 109.5 . . ?
Cl1 C39 Cl2 112.6(3) . . ?
Cl1 C39 Cl3 108.8(3) . . ?
Cl2 C39 Cl3 109.4(3) . . ?
Cl1 C39 H39 108.7 . . ?
Cl2 C39 H39 108.7 . . ?
Cl3 C39 H39 108.7 . . ?
C7 N1 N2 103.0(3) . . ?
C8 N2 N1 112.4(3) . . ?
C8 N2 C9 127.0(3) . . ?
N1 N2 C9 120.4(3) . . ?
C11 N3 N4 104.0(3) . . ?
C12 N4 N3 112.0(3) . . ?
C12 N4 C13 127.6(3) . . ?
N3 N4 C13 120.4(3) . . ?
C15 N5 N6 104.5(3) . . ?
N5 N6 C16 111.2(3) . . ?
N5 N6 C17 119.6(3) . . ?
C16 N6 C17 129.0(4) . . ?
C19 N7 N8 103.9(3) . . ?
C20 N8 N7 112.2(3) . . ?
C20 N8 C21 126.8(3) . . ?
N7 N8 C21 121.0(3) . . ?
C23 N9 N10 103.5(3) . . ?
C24 N10 N9 112.3(3) . . ?
C24 N10 C25 127.9(4) . . ?
N9 N10 C25 119.7(3) . . ?
O1 P1 C26 110.37(15) . . ?
O1 P1 C35 109.81(15) . . ?
C26 P1 C35 102.23(17) . . ?
O1 P1 C31 111.01(17) . . ?
C26 P1 C31 111.03(15) . . ?
C35 P1 C31 112.08(18) . . ?

_diffrn_measured_fraction_theta_max 0.930
_diffrn_reflns_theta_full        25.90
_diffrn_measured_fraction_theta_full 0.930
_refine_diff_density_max         0.637
_refine_diff_density_min         -0.683
_refine_diff_density_rms         0.093

#======END============================
 
data_compound6

_audit_creation_method            SHELXL-97 
_chemical_name_systematic 
; 
 ? 
; 
_chemical_name_common             ? 
_chemical_melting_point           ? 
_chemical_formula_moiety          'C59 H57 Fe N10 O17 P Rh4, C2H3N' 
_chemical_formula_sum 
 'C61 H60 Fe N11 O17 P Rh4' 
_chemical_formula_weight          1717.66 
 
loop_ 
 _atom_type_symbol 
 _atom_type_description 
 _atom_type_scat_dispersion_real 
 _atom_type_scat_dispersion_imag 
 _atom_type_scat_source 
 'C'  'C'   0.0033   0.0016 
 'International Tables Vol C Tables 4.2.6.8 and 6.1.1.4' 
 'H'  'H'   0.0000   0.0000 
 'International Tables Vol C Tables 4.2.6.8 and 6.1.1.4' 
 'N'  'N'   0.0061   0.0033 
 'International Tables Vol C Tables 4.2.6.8 and 6.1.1.4' 
 'O'  'O'   0.0106   0.0060 
 'International Tables Vol C Tables 4.2.6.8 and 6.1.1.4' 
 'P'  'P'   0.1023   0.0942 
 'International Tables Vol C Tables 4.2.6.8 and 6.1.1.4' 
 'Fe'  'Fe'   0.3463   0.8444 
 'International Tables Vol C Tables 4.2.6.8 and 6.1.1.4' 
 'Rh'  'Rh'  -1.1178   0.9187 
 'International Tables Vol C Tables 4.2.6.8 and 6.1.1.4' 
 
_symmetry_cell_setting            'monoclinic' 
_symmetry_space_group_name_H-M    'P21/n' 
_symmetry_int_tables_number      14
_symmetry_space_group_name_Hall  '-P 2YN'
 
loop_ 
 _symmetry_equiv_pos_as_xyz 
 'x, y, z' 
 '-x+1/2, y+1/2, -z+1/2' 
 '-x, -y, -z' 
 'x-1/2, -y-1/2, z-1/2' 
 
_cell_length_a                    19.152(2) 
_cell_length_b                    30.145(4) 
_cell_length_c                    22.918(3) 
_cell_angle_alpha                 90.00 
_cell_angle_beta                  92.807(10) 
_cell_angle_gamma                 90.00 
_cell_volume                      13215(3) 
_cell_formula_units_Z             4 
_cell_measurement_temperature     180(2) 
_cell_measurement_reflns_used     16436 
_cell_measurement_theta_min       1.115 
_cell_measurement_theta_max       20.545 
 
_exptl_crystal_description        'prism' 
_exptl_crystal_colour             'purple' 
_exptl_crystal_size_max           0.25 
_exptl_crystal_size_mid           0.15 
_exptl_crystal_size_min           0.077 
_exptl_crystal_density_meas       ? 
_exptl_crystal_density_diffrn     0.863 
_exptl_crystal_density_method     'not measured' 
_exptl_crystal_F_000              3440 
_exptl_absorpt_coefficient_mu     0.647 
_exptl_absorpt_correction_type    'numerical' 
_exptl_absorpt_correction_T_min   0.8723 
_exptl_absorpt_correction_T_max   0.9558 
_exptl_absorpt_process_details   'XRED; Stoe & Cie, 1999'
 
_exptl_special_details 
; 
 ? 
; 
 
_diffrn_ambient_temperature       180(2) 
_diffrn_radiation_wavelength      0.71069 
_diffrn_radiation_type            MoK\a 
_diffrn_radiation_source          'fine-focus sealed tube' 
_diffrn_radiation_monochromator   graphite 
_diffrn_measurement_device_type   'Stoe Ipds'
_diffrn_measurement_method       \f
_diffrn_detector_area_resol_mean  6
_diffrn_standards_number          ? 
_diffrn_standards_interval_count  ? 
_diffrn_standards_interval_time   ? 
_diffrn_standards_decay_%         0 
_diffrn_reflns_number             47024 
_diffrn_reflns_av_R_equivalents   0.2531 
_diffrn_reflns_av_sigmaI/netI     0.3311 
_diffrn_reflns_limit_h_min        -18 
_diffrn_reflns_limit_h_max        18 
_diffrn_reflns_limit_k_min        -29 
_diffrn_reflns_limit_k_max        29 
_diffrn_reflns_limit_l_min        -22 
_diffrn_reflns_limit_l_max        22 
_diffrn_reflns_theta_min          1.12 
_diffrn_reflns_theta_max          20.46 
_reflns_number_total              12866 
_reflns_number_gt                 3706 
_reflns_threshold_expression      >2sigma(I) 
 
_computing_data_collection       'EXPOSE (Stoe & Cie, 1999)'
_computing_cell_refinement       'CELL (Stoe & Cie, 1999)'
_computing_data_reduction        'XRED (Stoe & Cie, 1999)'
_computing_structure_solution    SIR97
_computing_structure_refinement   'SHELXL-97 (Sheldrick, 1997)'
_computing_molecular_graphics     ORTEP
_computing_publication_material   'SHELXL-97 (Sheldrick, 1997)'
 
_refine_special_details 
; 
 Refinement of F^2^ against ALL reflections.  The weighted R-factor wR and 
 goodness of fit S are based on F^2^, conventional R-factors R are based 
 on F, with F set to zero for negative F^2^. The threshold expression of 
 F^2^ > 2sigma(F^2^) is used only for calculating R-factors(gt) etc. and is 
 not relevant to the choice of reflections for refinement.  R-factors based 
 on F^2^ are statistically about twice as large as those based on F, and R- 
 factors based on ALL data will be even larger. 
; 
 
_refine_ls_structure_factor_coef  Fsqd  
_refine_ls_matrix_type            full 
_refine_ls_weighting_scheme       calc  
_refine_ls_weighting_details 
 'calc w=1/[\s^2^(Fo^2^)+(0.1541P)^2^+0.0000P] where P=(Fo^2^+2Fc^2^)/3' 
_atom_sites_solution_primary      direct 
_atom_sites_solution_secondary    difmap 
_atom_sites_solution_hydrogens    geom 
_refine_ls_hydrogen_treatment     constr 
_refine_ls_extinction_method      none 
_refine_ls_extinction_coef        ? 
_refine_ls_number_reflns          12866 
_refine_ls_number_parameters      385 
_refine_ls_number_restraints      33 
_refine_ls_R_factor_all           0.2287 
_refine_ls_R_factor_gt            0.1256 
_refine_ls_wR_factor_ref          0.3372 
_refine_ls_wR_factor_gt           0.2979 
_refine_ls_goodness_of_fit_ref    0.790 
_refine_ls_restrained_S_all       0.792 
_refine_ls_shift/su_max           0.039 
_refine_ls_shift/su_mean          0.001 
 
loop_ 
 _atom_site_label 
 _atom_site_type_symbol 
 _atom_site_fract_x 
 _atom_site_fract_y 
 _atom_site_fract_z 
 _atom_site_U_iso_or_equiv 
 _atom_site_adp_type 
 _atom_site_occupancy 
 _atom_site_symmetry_multiplicity 
 _atom_site_calc_flag 
 _atom_site_refinement_flags 
 _atom_site_disorder_assembly 
 _atom_site_disorder_group 
Rh1 Rh 0.23854(9) 0.33200(9) 0.75040(9) 0.0771(8) Uani 1 1 d . . . 
Rh2 Rh 0.32867(10) 0.34851(9) 0.82340(9) 0.0750(8) Uani 1 1 d . . . 
Rh3 Rh 0.31944(10) 0.21308(10) 0.19623(9) 0.0859(9) Uani 1 1 d . . . 
Rh4 Rh 0.26132(10) 0.18122(10) 0.27766(9) 0.0877(9) Uani 1 1 d . . . 
Fe5 Fe 0.10500(15) 0.16924(16) 0.57271(14) 0.0730(13) Uani 1 1 d . . . 
P1 P 0.0020(4) 0.0797(4) 0.6401(3) 0.106(3) Uani 1 1 d D . . 
C1 C 0.0416(11) 0.1860(8) 0.4983(10) 0.055(6) Uiso 1 1 d . . . 
C2 C 0.0298(14) 0.2150(10) 0.5472(11) 0.081(8) Uiso 1 1 d . . . 
C3 C 0.0996(12) 0.2376(9) 0.5703(10) 0.064(5) Uiso 1 1 d . . . 
C4 C 0.1517(12) 0.2267(9) 0.5256(10) 0.064(5) Uiso 1 1 d . . . 
C5 C 0.1237(13) 0.1909(9) 0.4897(11) 0.081(8) Uiso 1 1 d D . . 
C6 C 0.1568(12) 0.1646(8) 0.4363(9) 0.068(7) Uiso 1 1 d D . . 
C7 C 0.1833(9) 0.1904(7) 0.3935(7) 0.040(6) Uiso 1 1 d D . . 
H7 H 0.1849 0.2218 0.3907 0.048 Uiso 1 1 calc R . . 
C8 C 0.1535(14) 0.1200(9) 0.4255(10) 0.096(10) Uiso 1 1 d D . . 
H8 H 0.1338 0.0965 0.4471 0.115 Uiso 1 1 calc R . . 
C9 C 0.2003(19) 0.0759(13) 0.3439(16) 0.145(14) Uiso 1 1 d . . . 
H9A H 0.1815 0.0777 0.3034 0.218 Uiso 1 1 calc R . . 
H9B H 0.1774 0.0516 0.3640 0.218 Uiso 1 1 calc R . . 
H9C H 0.2508 0.0704 0.3442 0.218 Uiso 1 1 calc R . . 
C10 C 0.2291(13) 0.2334(9) 0.5342(11) 0.083(9) Uiso 1 1 d D . . 
C11 C 0.2807(10) 0.2067(8) 0.5139(9) 0.060(7) Uiso 1 1 d D . . 
H11 H 0.2779 0.1779 0.4970 0.072 Uiso 1 1 calc R . . 
C12 C 0.2537(11) 0.2734(9) 0.5554(11) 0.081(8) Uiso 1 1 d D . . 
H12 H 0.2274 0.2974 0.5698 0.097 Uiso 1 1 calc R . . 
C13 C 0.3667(8) 0.3142(7) 0.5785(10) 0.130(12) Uiso 1 1 d . . . 
H13A H 0.4155 0.3057 0.5871 0.195 Uiso 1 1 calc R . . 
H13B H 0.3458 0.3239 0.6146 0.195 Uiso 1 1 calc R . . 
H13C H 0.3647 0.3385 0.5501 0.195 Uiso 1 1 calc R . . 
C14 C 0.1122(6) 0.2820(4) 0.6083(5) 0.021(2) Uiso 1 1 d RD . . 
C15 C 0.1526(6) 0.2843(4) 0.6619(5) 0.021(2) Uiso 1 1 d RD . . 
H15 H 0.1712 0.2595 0.6829 0.025 Uiso 1 1 calc R . . 
N5 N 0.1612(10) 0.3294(6) 0.6793(8) 0.082(7) Uiso 1 1 d D . . 
N6 N 0.1184(6) 0.3503(5) 0.6432(6) 0.021(2) Uiso 1 1 d D . . 
C16 C 0.0949(8) 0.3278(5) 0.5959(7) 0.021(2) Uiso 1 1 d D . . 
H16 H 0.0719 0.3394 0.5616 0.025 Uiso 1 1 calc R . . 
C17 C 0.1165(13) 0.3926(9) 0.6585(11) 0.071(8) Uiso 1 1 d . . . 
H17A H 0.1113 0.3948 0.7007 0.107 Uiso 1 1 calc R . . 
H17B H 0.0768 0.4071 0.6377 0.107 Uiso 1 1 calc R . . 
H17C H 0.1600 0.4071 0.6483 0.107 Uiso 1 1 calc R . . 
C18 C -0.0403(11) 0.2313(8) 0.5657(9) 0.061(7) Uiso 1 1 d D . . 
C19 C -0.1018(9) 0.2231(7) 0.5349(9) 0.054(6) Uiso 1 1 d D . . 
H19 H -0.1096 0.2066 0.4999 0.065 Uiso 1 1 calc R . . 
C20 C -0.0547(10) 0.2490(9) 0.6191(10) 0.074(8) Uiso 1 1 d D . . 
H20 H -0.0211 0.2554 0.6498 0.089 Uiso 1 1 calc R . . 
C21 C -0.2324(4) 0.2521(3) 0.5579(3) 0.098(10) Uiso 1 1 d . . . 
H21A H -0.2419 0.2737 0.5266 0.147 Uiso 1 1 calc R . . 
H21B H -0.2506 0.2634 0.5943 0.147 Uiso 1 1 calc R . . 
H21C H -0.2554 0.2239 0.5476 0.147 Uiso 1 1 calc R . . 
C22 C -0.0062(4) 0.1537(3) 0.4672(3) 0.032(2) Uiso 1 1 d RD . . 
C23 C -0.0416(4) 0.1723(3) 0.4171(3) 0.032(2) Uiso 1 1 d RD . . 
H23 H -0.0371 0.2019 0.4035 0.038 Uiso 1 1 calc R . . 
N9 N -0.0849(4) 0.1388(3) 0.3909(3) 0.032(2) Uiso 1 1 d RD . . 
N10 N -0.0762(4) 0.0996(3) 0.4248(3) 0.058(5) Uiso 1 1 d RD . . 
C24 C -0.0276(4) 0.1088(3) 0.4719(3) 0.032(2) Uiso 1 1 d RD . . 
H24 H -0.0120 0.0885 0.5015 0.038 Uiso 1 1 calc R . . 
C25 C -0.1200(17) 0.0613(11) 0.4171(14) 0.124(12) Uiso 1 1 d . . . 
H25A H -0.1407 0.0609 0.3771 0.186 Uiso 1 1 calc R . . 
H25B H -0.1572 0.0624 0.4449 0.186 Uiso 1 1 calc R . . 
H25C H -0.0920 0.0345 0.4240 0.186 Uiso 1 1 calc R . . 
C26 C 0.0736(9) 0.1166(7) 0.6213(8) 0.089(9) Uiso 1 1 d G . . 
C27 C 0.1102(10) 0.1470(7) 0.6589(8) 0.096(7) Uiso 1 1 d G . . 
H27 H 0.0927 0.1605 0.6926 0.115 Uiso 1 1 calc R . . 
C28 C 0.1777(10) 0.1534(7) 0.6373(9) 0.096(7) Uiso 1 1 d G . . 
H28 H 0.2132 0.1721 0.6540 0.115 Uiso 1 1 calc R . . 
C29 C 0.1827(9) 0.1271(7) 0.5864(8) 0.108(11) Uiso 1 1 d G . . 
H29 H 0.2221 0.1251 0.5630 0.129 Uiso 1 1 calc R . . 
C30 C 0.1183(9) 0.1044(6) 0.5765(7) 0.047(6) Uiso 1 1 d G . . 
H30 H 0.1072 0.0844 0.5453 0.057 Uiso 1 1 calc R . . 
C31 C -0.070(2) 0.1068(16) 0.658(2) 0.167(16) Uiso 1 1 d . . . 
C32 C -0.1400(17) 0.0867(12) 0.6874(14) 0.127(12) Uiso 1 1 d . . . 
H32A H -0.1359 0.0908 0.7299 0.191 Uiso 1 1 calc R . . 
H32B H -0.1442 0.0550 0.6785 0.191 Uiso 1 1 calc R . . 
H32C H -0.1816 0.1023 0.6715 0.191 Uiso 1 1 calc R . . 
C33 C -0.1082(14) 0.1235(10) 0.6054(12) 0.089(9) Uiso 1 1 d . . . 
H33A H -0.1265 0.0984 0.5821 0.134 Uiso 1 1 calc R . . 
H33B H -0.0764 0.1409 0.5823 0.134 Uiso 1 1 calc R . . 
H33C H -0.1471 0.1422 0.6167 0.134 Uiso 1 1 calc R . . 
C34 C -0.0542(15) 0.1461(10) 0.7021(12) 0.099(10) Uiso 1 1 d . . . 
H34A H -0.0246 0.1353 0.7352 0.149 Uiso 1 1 calc R . . 
H34B H -0.0981 0.1576 0.7163 0.149 Uiso 1 1 calc R . . 
H34C H -0.0298 0.1699 0.6822 0.149 Uiso 1 1 calc R . . 
C35 C 0.0363(17) 0.0397(11) 0.6981(13) 0.126(12) Uiso 1 1 d D . . 
C36 C 0.000(2) -0.0046(12) 0.7106(17) 0.167(16) Uiso 1 1 d D . . 
H36A H -0.0485 -0.0037 0.6942 0.250 Uiso 1 1 calc R . . 
H36B H -0.0005 -0.0092 0.7529 0.250 Uiso 1 1 calc R . . 
H36C H 0.0249 -0.0289 0.6927 0.250 Uiso 1 1 calc R . . 
C37 C 0.109(2) 0.036(2) 0.672(2) 0.26(3) Uiso 1 1 d D . . 
H37A H 0.1237 0.0650 0.6586 0.390 Uiso 1 1 calc R . . 
H37B H 0.1067 0.0149 0.6396 0.390 Uiso 1 1 calc R . . 
H37C H 0.1429 0.0252 0.7026 0.390 Uiso 1 1 calc R . . 
C38 C 0.051(3) 0.0566(17) 0.7618(18) 0.23(2) Uiso 1 1 d D . . 
H38A H 0.0398 0.0883 0.7638 0.338 Uiso 1 1 calc R . . 
H38B H 0.1005 0.0521 0.7732 0.338 Uiso 1 1 calc R . . 
H38C H 0.0221 0.0401 0.7884 0.338 Uiso 1 1 calc R . . 
C39 C 0.2401(14) 0.2716(10) 0.8561(12) 0.075(8) Uiso 1 1 d . . . 
C40 C 0.2183(12) 0.2364(9) 0.8879(11) 0.070(8) Uiso 1 1 d . . . 
C41 C 0.1920(16) 0.3964(11) 0.8386(14) 0.095(10) Uiso 1 1 d . . . 
C42 C 0.1458(13) 0.4328(9) 0.8655(11) 0.079(8) Uiso 1 1 d . . . 
C43 C 0.319(2) 0.4054(15) 0.7168(17) 0.133(13) Uiso 1 1 d . . . 
C44 C 0.350(3) 0.4437(18) 0.674(2) 0.20(2) Uiso 1 1 d . . . 
C45 C 0.3605(19) 0.2811(13) 0.7536(17) 0.123(12) Uiso 1 1 d . . . 
C46 C 0.4041(14) 0.2461(10) 0.7176(12) 0.089(9) Uiso 1 1 d . . . 
H46A H 0.4270 0.2633 0.6870 0.107 Uiso 1 1 calc R . . 
H46B H 0.4420 0.2351 0.7447 0.107 Uiso 1 1 calc R . . 
C47 C 0.3735(11) 0.2078(8) 0.6892(10) 0.057(7) Uiso 1 1 d . . . 
H47A H 0.3477 0.2178 0.6531 0.068 Uiso 1 1 calc R . . 
H47B H 0.3388 0.1951 0.7152 0.068 Uiso 1 1 calc R . . 
C48 C 0.4267(19) 0.1684(13) 0.6719(16) 0.144(14) Uiso 1 1 d . . . 
H48A H 0.4492 0.1555 0.7078 0.172 Uiso 1 1 calc R . . 
H48B H 0.4639 0.1807 0.6481 0.172 Uiso 1 1 calc R . . 
C49 C 0.3844(17) 0.1294(12) 0.6348(14) 0.116(11) Uiso 1 1 d . . . 
C50 C 0.191(2) 0.2582(14) 0.219(2) 0.167(16) Uiso 1 1 d D . . 
C51 C 0.1317(17) 0.2949(12) 0.2075(15) 0.121(12) Uiso 1 1 d D . . 
C52 C 0.2223(18) 0.1403(13) 0.1570(15) 0.113(11) Uiso 1 1 d . . . 
C53 C 0.1777(14) 0.1045(9) 0.1283(11) 0.102(10) Uiso 1 1 d D . . 
C54 C 0.3825(14) 0.1330(11) 0.2470(13) 0.083(9) Uiso 1 1 d . . . 
C55 C 0.4387(18) 0.0961(12) 0.2559(15) 0.122(12) Uiso 1 1 d . . . 
C56 C 0.3691(15) 0.2581(11) 0.3158(13) 0.088(9) Uiso 1 1 d . . . 
C57 C 0.3972(13) 0.2860(10) 0.3523(11) 0.082(8) Uiso 1 1 d . . . 
H57A H 0.4144 0.3117 0.3302 0.098 Uiso 1 1 calc R . . 
H57B H 0.4382 0.2718 0.3725 0.098 Uiso 1 1 calc R . . 
C58 C 0.3518(14) 0.3022(10) 0.3957(12) 0.087(9) Uiso 1 1 d . . . 
H58A H 0.3280 0.2768 0.4137 0.104 Uiso 1 1 calc R . . 
H58B H 0.3800 0.3176 0.4269 0.104 Uiso 1 1 calc R . . 
C59 C 0.305(3) 0.3295(19) 0.373(2) 0.21(2) Uiso 1 1 d . . . 
O1 O -0.0157(11) 0.0473(8) 0.5888(10) 0.116(7) Uiso 1 1 d . . . 
O2 O 0.2633(7) 0.3963(5) 0.8570(6) 0.058(4) Uiso 1 1 d . . . 
O3 O 0.1708(10) 0.3790(7) 0.7916(9) 0.100(6) Uiso 1 1 d . . . 
O4 O 0.3870(8) 0.3038(6) 0.7874(7) 0.072(5) Uiso 1 1 d . . . 
O5 O 0.3011(7) 0.2855(5) 0.7171(6) 0.059(4) Uiso 1 1 d . . . 
O6 O 0.3651(9) 0.3967(6) 0.7712(8) 0.085(6) Uiso 1 1 d . . . 
O7 O 0.2826(9) 0.3771(7) 0.7015(7) 0.078(5) Uiso 1 1 d . . . 
O8 O 0.2059(7) 0.2835(5) 0.8114(7) 0.062(4) Uiso 1 1 d . . . 
O9 O 0.2872(9) 0.2963(6) 0.8701(7) 0.074(5) Uiso 1 1 d . . . 
O10 O 0.3348(10) 0.1386(7) 0.2866(8) 0.100(6) Uiso 1 1 d . . . 
O11 O 0.3912(9) 0.1626(7) 0.2122(8) 0.086(6) Uiso 1 1 d . . . 
O12 O 0.2415(9) 0.2553(6) 0.1876(7) 0.077(5) Uiso 1 1 d . . . 
O13 O 0.1847(9) 0.2315(7) 0.2708(8) 0.097(6) Uiso 1 1 d . . . 
O14 O 0.3145(10) 0.2239(7) 0.3269(8) 0.109(7) Uiso 1 1 d . . . 
O15 O 0.3719(7) 0.2525(5) 0.2522(7) 0.064(5) Uiso 1 1 d . . . 
O16 O 0.2619(10) 0.1720(7) 0.1475(8) 0.102(6) Uiso 1 1 d D . . 
O17 O 0.2147(10) 0.1403(7) 0.2216(8) 0.113(7) Uiso 1 1 d D . . 
N1 N 0.2063(8) 0.1599(6) 0.3567(7) 0.051(5) Uiso 1 1 d D . . 
N2 N 0.1868(9) 0.1194(6) 0.3750(8) 0.060(6) Uiso 1 1 d D . . 
N3 N 0.3227(10) 0.2710(7) 0.5511(9) 0.080(7) Uiso 1 1 d D . . 
N4 N 0.3372(9) 0.2337(6) 0.5252(8) 0.062(6) Uiso 1 1 d D . . 
N7 N -0.1230(8) 0.2558(6) 0.6209(6) 0.041(5) Uiso 1 1 d D . . 
N8 N -0.1485(8) 0.2443(6) 0.5668(7) 0.050(5) Uiso 1 1 d D . . 
C111 C 0.0464(13) 0.2631(12) 0.7842(11) 0.072(8) Uiso 1 1 d . . . 
N112 N 0.0416(18) 0.3020(15) 0.7877(16) 0.177(14) Uiso 1 1 d . . . 
C113 C 0.0646(12) 0.2191(9) 0.7843(10) 0.065(7) Uiso 1 1 d . . . 
H11A H 0.0790 0.2106 0.7455 0.098 Uiso 1 1 calc R . . 
H11B H 0.0243 0.2011 0.7945 0.098 Uiso 1 1 calc R . . 
H11C H 0.1033 0.2141 0.8131 0.098 Uiso 1 1 calc R . . 
 
loop_ 
 _atom_site_aniso_label 
 _atom_site_aniso_U_11 
 _atom_site_aniso_U_22 
 _atom_site_aniso_U_33 
 _atom_site_aniso_U_23 
 _atom_site_aniso_U_13 
 _atom_site_aniso_U_12 
Rh1 0.0395(11) 0.130(2) 0.0613(14) -0.0056(15) -0.0014(10) 0.0050(13) 
Rh2 0.0454(11) 0.121(2) 0.0578(13) -0.0074(14) -0.0062(10) -0.0105(13) 
Rh3 0.0400(11) 0.164(3) 0.0548(13) 0.0057(16) 0.0168(10) -0.0016(14) 
Rh4 0.0516(13) 0.157(3) 0.0573(14) 0.0061(16) 0.0255(10) -0.0015(15) 
Fe5 0.0342(18) 0.131(4) 0.054(2) 0.006(2) 0.0021(15) -0.009(2) 
P1 0.065(5) 0.185(11) 0.069(5) 0.019(6) 0.011(4) 0.000(6) 
 
_geom_special_details 
; 
 All esds (except the esd in the dihedral angle between two l.s. planes) 
 are estimated using the full covariance matrix.  The cell esds are taken 
 into account individually in the estimation of esds in distances, angles 
 and torsion angles; correlations between esds in cell parameters are only 
 used when they are defined by crystal symmetry.  An approximate (isotropic) 
 treatment of cell esds is used for estimating esds involving l.s. planes. 
; 
 
loop_ 
 _geom_bond_atom_site_label_1 
 _geom_bond_atom_site_label_2 
 _geom_bond_distance 
 _geom_bond_site_symmetry_2 
 _geom_bond_publ_flag 
Rh1 O7 1.978(18) . ? 
Rh1 O5 2.020(15) . ? 
Rh1 O8 2.137(16) . ? 
Rh1 N5 2.150(18) . ? 
Rh1 O3 2.17(2) . ? 
Rh1 Rh2 2.397(3) . ? 
Rh2 O4 1.958(17) . ? 
Rh2 O6 2.027(18) . ? 
Rh2 O2 2.081(15) . ? 
Rh2 O9 2.083(18) . ? 
Rh2 N9 2.241(8) 4_666 ? 
Rh3 O12 1.965(17) . ? 
Rh3 O16 1.970(19) . ? 
Rh3 O15 1.986(16) . ? 
Rh3 O11 2.072(19) . ? 
Rh3 N7 2.293(15) 4_665 ? 
Rh3 Rh4 2.418(3) . ? 
Rh4 O10 1.91(2) . ? 
Rh4 O14 1.96(2) . ? 
Rh4 O17 1.965(19) . ? 
Rh4 O13 2.110(19) . ? 
Rh4 N1 2.233(16) . ? 
Fe5 C29 1.97(2) . ? 
Fe5 C30 1.974(19) . ? 
Fe5 C28 2.04(2) . ? 
Fe5 C26 2.05(2) . ? 
Fe5 C2 2.06(3) . ? 
Fe5 C5 2.06(2) . ? 
Fe5 C3 2.07(3) . ? 
Fe5 C27 2.08(2) . ? 
Fe5 C1 2.11(2) . ? 
Fe5 C4 2.25(2) . ? 
P1 O1 1.55(2) . ? 
P1 C31 1.68(4) . ? 
P1 C26 1.833(19) . ? 
P1 C35 1.89(2) . ? 
C1 C2 1.45(3) . ? 
C1 C22 1.49(2) . ? 
C1 C5 1.60(3) . ? 
C2 C18 1.51(3) . ? 
C2 C3 1.57(3) . ? 
C3 C4 1.50(3) . ? 
C3 C14 1.61(3) . ? 
C4 C5 1.44(3) . ? 
C4 C10 1.50(3) . ? 
C5 C6 1.62(2) . ? 
C6 C8 1.37(2) . ? 
C6 C7 1.369(16) . ? 
C7 N1 1.336(15) . ? 
C8 N2 1.350(17) . ? 
C9 N2 1.52(4) . ? 
C10 C11 1.374(17) . ? 
C10 C12 1.37(2) . ? 
C11 N4 1.371(16) . ? 
C12 N3 1.332(17) . ? 
C13 N3 1.66(2) . ? 
C14 C15 1.4200 . ? 
C14 C16 1.445(17) . ? 
C15 N5 1.424(16) . ? 
N5 N6 1.297(15) . ? 
N6 C17 1.32(3) . ? 
N6 C16 1.340(14) . ? 
C18 C19 1.366(16) . ? 
C18 C20 1.38(2) . ? 
C19 N8 1.344(16) . ? 
C20 N7 1.327(16) . ? 
C21 N8 1.628(17) . ? 
C22 C24 1.4200 . ? 
C22 C23 1.4200 . ? 
C23 N9 1.4200 . ? 
N9 N10 1.4200 . ? 
N9 Rh2 2.241(8) 4_565 ? 
N10 C24 1.4200 . ? 
N10 C25 1.43(3) . ? 
C26 C27 1.419(13) . ? 
C26 C30 1.419(13) . ? 
C27 C28 1.419(13) . ? 
C28 C29 1.419(13) . ? 
C29 C30 1.419(13) . ? 
C31 C33 1.47(4) . ? 
C31 C34 1.58(5) . ? 
C31 C32 1.64(5) . ? 
C35 C36 1.54(3) . ? 
C35 C37 1.54(3) . ? 
C35 C38 1.56(3) . ? 
C39 O9 1.20(3) . ? 
C39 O8 1.24(3) . ? 
C39 C40 1.36(3) . ? 
C41 O3 1.25(3) . ? 
C41 O2 1.41(3) . ? 
C41 C42 1.56(4) . ? 
C43 O7 1.15(4) . ? 
C43 O6 1.51(4) . ? 
C43 C44 1.64(6) . ? 
C45 O4 1.14(4) . ? 
C45 O5 1.39(4) . ? 
C45 C46 1.60(4) . ? 
C46 C47 1.44(3) . ? 
C47 C48 1.63(4) . ? 
C48 C49 1.64(4) . ? 
C50 O12 1.24(4) . ? 
C50 O13 1.44(4) . ? 
C50 C51 1.60(3) . ? 
C52 O16 1.24(3) . ? 
C52 O17 1.49(3) . ? 
C52 C53 1.51(4) . ? 
C54 O11 1.21(3) . ? 
C54 O10 1.33(3) . ? 
C54 C55 1.55(4) . ? 
C56 C57 1.29(3) . ? 
C56 O15 1.47(3) . ? 
C56 O14 1.50(3) . ? 
C57 C58 1.44(3) . ? 
C58 C59 1.31(5) . ? 
N1 N2 1.350(15) . ? 
N3 N4 1.307(16) . ? 
N7 N8 1.355(14) . ? 
N7 Rh3 2.293(15) 4_566 ? 
C111 N112 1.18(4) . ? 
C111 C113 1.37(3) . ? 
 
loop_ 
 _geom_angle_atom_site_label_1 
 _geom_angle_atom_site_label_2 
 _geom_angle_atom_site_label_3 
 _geom_angle 
 _geom_angle_site_symmetry_1 
 _geom_angle_site_symmetry_3 
 _geom_angle_publ_flag 
O7 Rh1 O5 89.2(6) . . ? 
O7 Rh1 O8 171.0(7) . . ? 
O5 Rh1 O8 88.3(6) . . ? 
O7 Rh1 N5 83.8(7) . . ? 
O5 Rh1 N5 95.0(6) . . ? 
O8 Rh1 N5 105.0(7) . . ? 
O7 Rh1 O3 94.5(7) . . ? 
O5 Rh1 O3 175.9(7) . . ? 
O8 Rh1 O3 87.8(6) . . ? 
N5 Rh1 O3 87.1(7) . . ? 
O7 Rh1 Rh2 86.6(5) . . ? 
O5 Rh1 Rh2 89.3(4) . . ? 
O8 Rh1 Rh2 84.8(4) . . ? 
N5 Rh1 Rh2 169.4(5) . . ? 
O3 Rh1 Rh2 89.2(6) . . ? 
O4 Rh2 O6 91.4(7) . . ? 
O4 Rh2 O2 176.6(7) . . ? 
O6 Rh2 O2 87.3(6) . . ? 
O4 Rh2 O9 86.3(7) . . ? 
O6 Rh2 O9 174.7(7) . . ? 
O2 Rh2 O9 94.7(6) . . ? 
O4 Rh2 N9 89.4(6) . 4_666 ? 
O6 Rh2 N9 91.2(6) . 4_666 ? 
O2 Rh2 N9 93.7(5) . 4_666 ? 
O9 Rh2 N9 93.5(5) . 4_666 ? 
O4 Rh2 Rh1 88.2(5) . . ? 
O6 Rh2 Rh1 89.6(5) . . ? 
O2 Rh2 Rh1 88.6(4) . . ? 
O9 Rh2 Rh1 85.5(5) . . ? 
N9 Rh2 Rh1 177.5(3) 4_666 . ? 
O12 Rh3 O16 87.1(8) . . ? 
O12 Rh3 O15 92.0(7) . . ? 
O16 Rh3 O15 174.2(7) . . ? 
O12 Rh3 O11 171.2(7) . . ? 
O16 Rh3 O11 89.2(8) . . ? 
O15 Rh3 O11 90.9(7) . . ? 
O12 Rh3 N7 92.8(6) . 4_665 ? 
O16 Rh3 N7 96.1(7) . 4_665 ? 
O15 Rh3 N7 89.7(6) . 4_665 ? 
O11 Rh3 N7 95.4(6) . 4_665 ? 
O12 Rh3 Rh4 87.6(5) . . ? 
O16 Rh3 Rh4 85.5(6) . . ? 
O15 Rh3 Rh4 88.7(4) . . ? 
O11 Rh3 Rh4 84.2(5) . . ? 
N7 Rh3 Rh4 178.3(4) 4_665 . ? 
O10 Rh4 O14 91.2(8) . . ? 
O10 Rh4 O17 87.5(8) . . ? 
O14 Rh4 O17 173.8(8) . . ? 
O10 Rh4 O13 176.1(8) . . ? 
O14 Rh4 O13 84.9(8) . . ? 
O17 Rh4 O13 96.3(8) . . ? 
O10 Rh4 N1 95.4(7) . . ? 
O14 Rh4 N1 88.5(7) . . ? 
O17 Rh4 N1 97.6(7) . . ? 
O13 Rh4 N1 85.0(7) . . ? 
O10 Rh4 Rh3 89.2(6) . . ? 
O14 Rh4 Rh3 86.4(6) . . ? 
O17 Rh4 Rh3 87.5(6) . . ? 
O13 Rh4 Rh3 90.1(5) . . ? 
N1 Rh4 Rh3 173.3(5) . . ? 
C29 Fe5 C30 42.2(4) . . ? 
C29 Fe5 C28 41.4(4) . . ? 
C30 Fe5 C28 69.8(7) . . ? 
C29 Fe5 C26 69.7(6) . . ? 
C30 Fe5 C26 41.3(4) . . ? 
C28 Fe5 C26 68.4(6) . . ? 
C29 Fe5 C2 171.9(9) . . ? 
C30 Fe5 C2 139.8(10) . . ? 
C28 Fe5 C2 143.8(10) . . ? 
C26 Fe5 C2 117.0(9) . . ? 
C29 Fe5 C5 100.8(9) . . ? 
C30 Fe5 C5 109.1(9) . . ? 
C28 Fe5 C5 127.0(9) . . ? 
C26 Fe5 C5 144.9(10) . . ? 
C2 Fe5 C5 71.1(10) . . ? 
C29 Fe5 C3 133.2(9) . . ? 
C30 Fe5 C3 175.4(8) . . ? 
C28 Fe5 C3 106.5(9) . . ? 
C26 Fe5 C3 140.6(8) . . ? 
C2 Fe5 C3 44.8(10) . . ? 
C5 Fe5 C3 70.7(10) . . ? 
C29 Fe5 C27 68.9(6) . . ? 
C30 Fe5 C27 68.8(6) . . ? 
C28 Fe5 C27 40.2(4) . . ? 
C26 Fe5 C27 40.2(4) . . ? 
C2 Fe5 C27 119.1(9) . . ? 
C5 Fe5 C27 167.2(9) . . ? 
C3 Fe5 C27 110.3(9) . . ? 
C29 Fe5 C1 133.2(8) . . ? 
C30 Fe5 C1 109.9(8) . . ? 
C28 Fe5 C1 172.1(8) . . ? 
C26 Fe5 C1 117.0(8) . . ? 
C2 Fe5 C1 40.7(9) . . ? 
C5 Fe5 C1 45.2(9) . . ? 
C3 Fe5 C1 73.3(9) . . ? 
C27 Fe5 C1 147.5(8) . . ? 
C29 Fe5 C4 104.9(8) . . ? 
C30 Fe5 C4 136.9(8) . . ? 
C28 Fe5 C4 104.8(8) . . ? 
C26 Fe5 C4 173.1(8) . . ? 
C2 Fe5 C4 68.7(10) . . ? 
C5 Fe5 C4 38.9(9) . . ? 
C3 Fe5 C4 40.4(8) . . ? 
C27 Fe5 C4 134.5(9) . . ? 
C1 Fe5 C4 69.8(9) . . ? 
O1 P1 C31 109.9(19) . . ? 
O1 P1 C26 110.1(10) . . ? 
C31 P1 C26 113.4(19) . . ? 
O1 P1 C35 100.8(15) . . ? 
C31 P1 C35 114(2) . . ? 
C26 P1 C35 108.3(13) . . ? 
C2 C1 C22 130.4(18) . . ? 
C2 C1 C5 103(2) . . ? 
C22 C1 C5 125.8(18) . . ? 
C2 C1 Fe5 67.9(14) . . ? 
C22 C1 Fe5 123.2(14) . . ? 
C5 C1 Fe5 65.8(12) . . ? 
C1 C2 C18 126(2) . . ? 
C1 C2 C3 111(2) . . ? 
C18 C2 C3 121(2) . . ? 
C1 C2 Fe5 71.4(15) . . ? 
C18 C2 Fe5 139.2(19) . . ? 
C3 C2 Fe5 67.9(14) . . ? 
C4 C3 C2 105(2) . . ? 
C4 C3 C14 117.7(19) . . ? 
C2 C3 C14 130.4(19) . . ? 
C4 C3 Fe5 76.4(14) . . ? 
C2 C3 Fe5 67.4(14) . . ? 
C14 C3 Fe5 144.0(15) . . ? 
C5 C4 C10 121(2) . . ? 
C5 C4 C3 108(2) . . ? 
C10 C4 C3 125(2) . . ? 
C5 C4 Fe5 63.4(14) . . ? 
C10 C4 Fe5 117.1(17) . . ? 
C3 C4 Fe5 63.2(13) . . ? 
C4 C5 C1 109.8(19) . . ? 
C4 C5 C6 131(2) . . ? 
C1 C5 C6 118(2) . . ? 
C4 C5 Fe5 77.7(14) . . ? 
C1 C5 Fe5 68.9(12) . . ? 
C6 C5 Fe5 129.5(18) . . ? 
C8 C6 C7 116(2) . . ? 
C8 C6 C5 127.2(19) . . ? 
C7 C6 C5 116(2) . . ? 
N1 C7 C6 102.0(17) . . ? 
N2 C8 C6 98(2) . . ? 
C11 C10 C12 113(2) . . ? 
C11 C10 C4 127(2) . . ? 
C12 C10 C4 119(2) . . ? 
N4 C11 C10 99(2) . . ? 
N3 C12 C10 104(2) . . ? 
C15 C14 C16 103.5(8) . . ? 
C15 C14 C3 124.8(10) . . ? 
C16 C14 C3 131.3(13) . . ? 
C14 C15 N5 109.9(9) . . ? 
N6 N5 C15 103.0(15) . . ? 
N6 N5 Rh1 148.8(14) . . ? 
C15 N5 Rh1 108.2(11) . . ? 
N5 N6 C17 109.0(17) . . ? 
N5 N6 C16 116.5(16) . . ? 
C17 N6 C16 133.6(18) . . ? 
N6 C16 C14 105.0(13) . . ? 
C19 C18 C20 108.9(19) . . ? 
C19 C18 C2 123(2) . . ? 
C20 C18 C2 127(2) . . ? 
N8 C19 C18 102.3(18) . . ? 
N7 C20 C18 109(2) . . ? 
C24 C22 C23 108.0 . . ? 
C24 C22 C1 139.2(10) . . ? 
C23 C22 C1 112.8(10) . . ? 
N9 C23 C22 108.0 . . ? 
N10 N9 C23 108.0 . . ? 
N10 N9 Rh2 125.6(2) . 4_565 ? 
C23 N9 Rh2 124.6(2) . 4_565 ? 
N9 N10 C24 108.0 . . ? 
N9 N10 C25 123.5(14) . . ? 
C24 N10 C25 127.5(14) . . ? 
N10 C24 C22 108.0 . . ? 
C27 C26 C30 108.0 . . ? 
C27 C26 P1 127.1(12) . . ? 
C30 C26 P1 119.8(12) . . ? 
C27 C26 Fe5 71.4(7) . . ? 
C30 C26 Fe5 66.6(7) . . ? 
P1 C26 Fe5 147.3(11) . . ? 
C26 C27 C28 108.0 . . ? 
C26 C27 Fe5 68.5(7) . . ? 
C28 C27 Fe5 68.1(7) . . ? 
C27 C28 C29 108.0 . . ? 
C27 C28 Fe5 71.6(7) . . ? 
C29 C28 Fe5 66.7(7) . . ? 
C30 C29 C28 108.0 . . ? 
C30 C29 Fe5 69.1(8) . . ? 
C28 C29 Fe5 71.9(7) . . ? 
C29 C30 C26 108.0 . . ? 
C29 C30 Fe5 68.7(8) . . ? 
C26 C30 Fe5 72.1(8) . . ? 
C33 C31 C34 110(3) . . ? 
C33 C31 C32 95(3) . . ? 
C34 C31 C32 99(3) . . ? 
C33 C31 P1 110(3) . . ? 
C34 C31 P1 113(3) . . ? 
C32 C31 P1 128(3) . . ? 
C36 C35 C37 116(4) . . ? 
C36 C35 C38 100(3) . . ? 
C37 C35 C38 105(4) . . ? 
C36 C35 P1 123(3) . . ? 
C37 C35 P1 94(3) . . ? 
C38 C35 P1 119(3) . . ? 
O9 C39 O8 114(3) . . ? 
O9 C39 C40 126(3) . . ? 
O8 C39 C40 120(3) . . ? 
O3 C41 O2 122(3) . . ? 
O3 C41 C42 118(3) . . ? 
O2 C41 C42 116(3) . . ? 
O7 C43 O6 116(4) . . ? 
O7 C43 C44 125(4) . . ? 
O6 C43 C44 114(3) . . ? 
O4 C45 O5 133(4) . . ? 
O4 C45 C46 122(3) . . ? 
O5 C45 C46 101(3) . . ? 
C47 C46 C45 124(3) . . ? 
C46 C47 C48 117(2) . . ? 
C47 C48 C49 110(3) . . ? 
O12 C50 O13 123(3) . . ? 
O12 C50 C51 121(4) . . ? 
O13 C50 C51 116(3) . . ? 
O16 C52 O17 105(3) . . ? 
O16 C52 C53 144(3) . . ? 
O17 C52 C53 111(3) . . ? 
O11 C54 O10 118(3) . . ? 
O11 C54 C55 120(3) . . ? 
O10 C54 C55 120(3) . . ? 
C57 C56 O15 133(3) . . ? 
C57 C56 O14 128(3) . . ? 
O15 C56 O14 99(2) . . ? 
C56 C57 C58 115(3) . . ? 
C59 C58 C57 111(3) . . ? 
C41 O2 Rh2 118.9(16) . . ? 
C41 O3 Rh1 118(2) . . ? 
C45 O4 Rh2 117(2) . . ? 
C45 O5 Rh1 108.8(18) . . ? 
C43 O6 Rh2 114(2) . . ? 
C43 O7 Rh1 127(3) . . ? 
C39 O8 Rh1 125.3(18) . . ? 
C39 O9 Rh2 129.1(19) . . ? 
C54 O10 Rh4 122.7(19) . . ? 
C54 O11 Rh3 123.0(18) . . ? 
C50 O12 Rh3 127(2) . . ? 
C50 O13 Rh4 112.1(19) . . ? 
C56 O14 Rh4 134.4(17) . . ? 
C56 O15 Rh3 131.8(16) . . ? 
C52 O16 Rh3 135(2) . . ? 
C52 O17 Rh4 126(2) . . ? 
C7 N1 N2 108.7(17) . . ? 
C7 N1 Rh4 119.9(13) . . ? 
N2 N1 Rh4 131.3(13) . . ? 
C8 N2 N1 114(2) . . ? 
C8 N2 C9 121(2) . . ? 
N1 N2 C9 125(2) . . ? 
N4 N3 C12 108(2) . . ? 
N4 N3 C13 137.0(17) . . ? 
C12 N3 C13 114.6(19) . . ? 
N3 N4 C11 114.4(19) . . ? 
C20 N7 N8 104.1(16) . . ? 
C20 N7 Rh3 126.7(14) . 4_566 ? 
N8 N7 Rh3 129.0(11) . 4_566 ? 
C19 N8 N7 113.6(16) . . ? 
C19 N8 C21 132.9(14) . . ? 
N7 N8 C21 112.7(12) . . ? 
N112 C111 C113 169(3) . . ? 
 
_diffrn_measured_fraction_theta_max    0.977 
_diffrn_reflns_theta_full              20.46 
_diffrn_measured_fraction_theta_full   0.977 
_refine_diff_density_max    1.574 
_refine_diff_density_min   -0.969 
_refine_diff_density_rms    0.162 

loop_
  _platon_squeeze_void_nr
  _platon_squeeze_void_average_x
  _platon_squeeze_void_average_y
  _platon_squeeze_void_average_z
  _platon_squeeze_void_volume
  _platon_squeeze_void_count_electrons
  _platon_squeeze_void_content
   1 -0.013 -0.006 -0.008      7674      4234 ' '
_platon_squeeze_details
;
;

#=======END==============================
